# Supplementary material for: Surgical Resection plus Intraoperative Radiofrequency Ablation versus Chemoembolization for the Treatment of Intermediate-Stage (BCLC B) Hepatocellular Carcinoma with Preserved Liver Function: A Propensity Score-Matched Analysis
Source: MDPI journal article supplement (doi:10.3390/cancers14102440), 2022-05-15
Supplement: s1 [file s1]

*Supplementary Materials*

# **Surgical Resection plus Intraoperative Radiofrequency Ablation versus Chemoembolization for the Treatment of Intermediate-Stage (BCLC B) Hepatocellular Carcinoma with Preserved Liver Function: A Propensity Score-Matched Analysis**

Gun Ha Kim, Jin Hyoung Kim, Heung Kyu Ko, Hee Ho Chu, Seong Ho Kim, Ji Hoon Shin, Dong Il Gwon, Gi-Young Ko, Hyun-Ki Yoon, Ki-Hun Kim, Ju Hyun Shim and Nayoung Kim

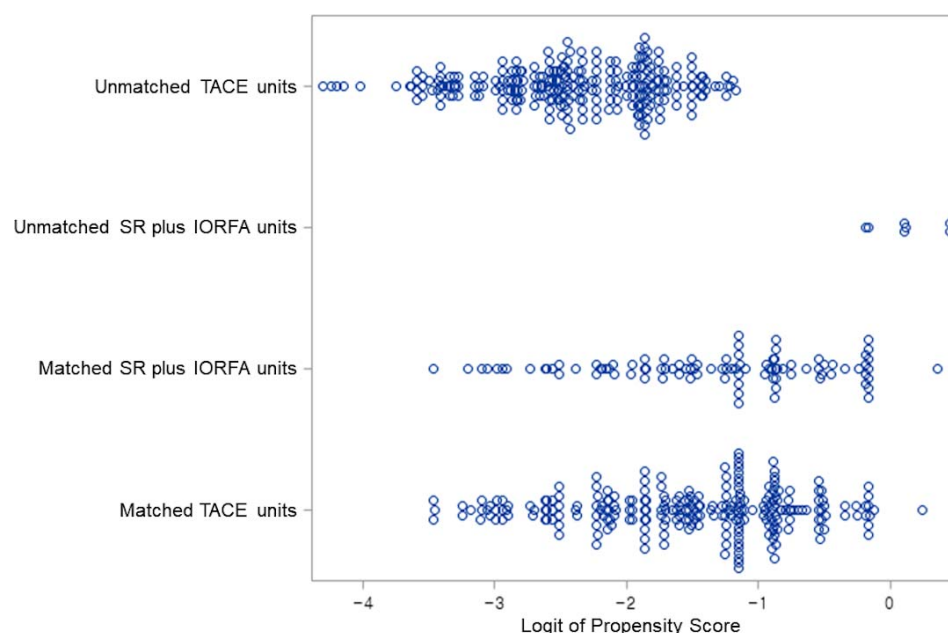

**Figure S1.** A jitter plot of propensity score distribution before and after matching.

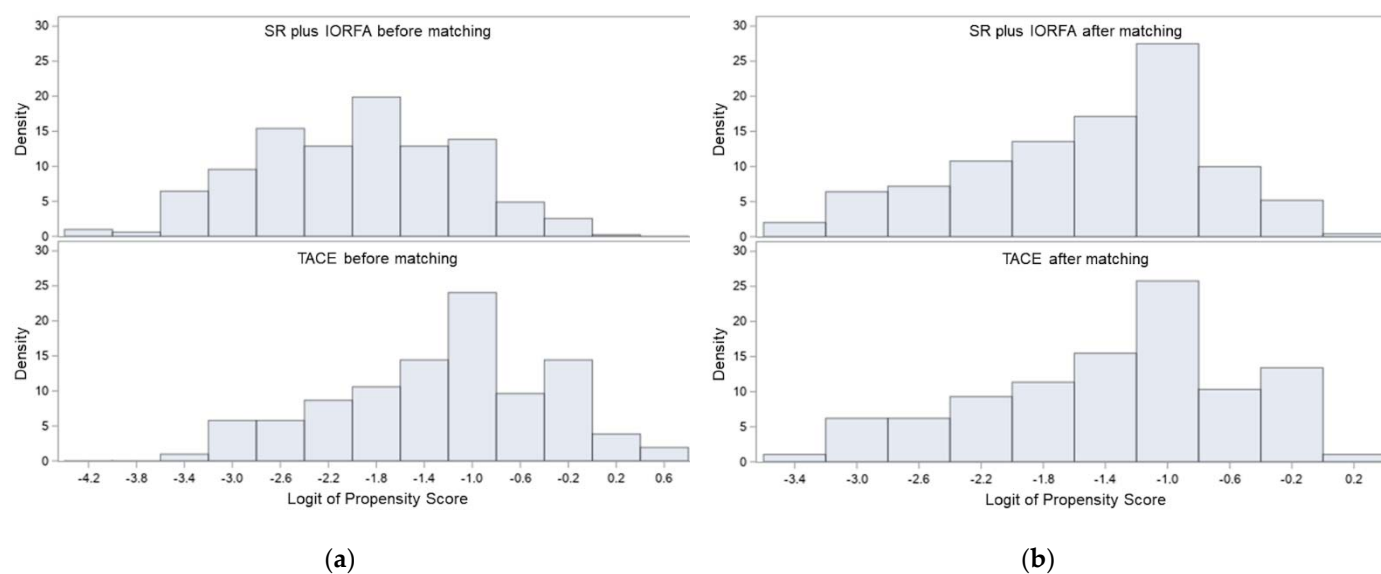

**Figure S2.** Histograms of propensity score distribution before (a) and after (b) matching.
